# Supplementary material
Source: PubMed Central journal article supplement (PMC6153044)
Supplement: NIHMS987528-supplement-1.pdf [file NIHMS987528-supplement-1.pdf]

Supplemental Table. Hazard ratios from survival analysis with and without death as a competing risk (sensitivity analysis). Hazard ratios showing the association between race and access to transplant among patients preemptively referred for kidney transplantation, 2005-2015

|                                                                                                                                                                                                                                                                                                                                                                                                                                                                                                                                                                                                                                                                                                                                                               | Model 1:<br>Unadjusted                             | Model 2: Adjusting<br>for Model 1 + Age <sup>a</sup> ,<br>Sex | Model 3:<br>Adjusting for<br>Model 2 +<br>patient insurance<br>and<br>neighborhood<br>poverty | Model 4:<br>Adjusting for<br>Model 3 +<br>patient<br>comorbidities <sup>b</sup> |
|---------------------------------------------------------------------------------------------------------------------------------------------------------------------------------------------------------------------------------------------------------------------------------------------------------------------------------------------------------------------------------------------------------------------------------------------------------------------------------------------------------------------------------------------------------------------------------------------------------------------------------------------------------------------------------------------------------------------------------------------------------------|----------------------------------------------------|---------------------------------------------------------------|-----------------------------------------------------------------------------------------------|---------------------------------------------------------------------------------|
|                                                                                                                                                                                                                                                                                                                                                                                                                                                                                                                                                                                                                                                                                                                                                               | HR for<br>African American<br>vs white<br>(95% CI) | HR<br>(95% CI)                                                | HR<br>(95% CI)                                                                                | HR<br>(95% CI)                                                                  |
| Sensitivity Analysis: Death as a Competing Risk for placement on the Deceased Donor Waitlist <sup>c</sup>                                                                                                                                                                                                                                                                                                                                                                                                                                                                                                                                                                                                                                                     | 1.05<br>(0.90, 1.22)                               | 1.05<br>(0.90, 1.22)                                          | 1.10<br>(0.95, 1.29)                                                                          | 0.95<br>(0.87, 1.03)                                                            |
| Sensitivity Analysis: Death as a Competing Risk for receipt of Living Donor Kidney Transplantation <sup>c</sup>                                                                                                                                                                                                                                                                                                                                                                                                                                                                                                                                                                                                                                               | 0.52<br>(0.44, 0.63)                               | 0.49<br>(0.41, 0.60)                                          | 0.40<br>(0.40, 0.59)                                                                          | 0.46<br>(0.38, 0.57)                                                            |
| <p>Abbreviations: CI, confidence interval; HR, hazard ratio.</p> <p><sup>a</sup>Age was treated as a continuous variable for Cox regression analysis</p> <p><sup>b</sup>Comorbid conditions include: attributed cause of end stage renal disease, body mass index, hypertension, diabetes, chronic obstructive pulmonary disease, tobacco, cancer and congestive heart failure</p> <p><sup>c</sup>Sensitivity analysis determined the association between patient characteristics and the outcome while account for death as a competing risk.</p> <p>Multiple imputation handled missing data within Model 4 for missing body mass index data (2.36%). Observations with missing values were excluded from the descriptive statistics for each variable.</p> |                                                    |                                                               |                                                                                               |                                                                                 |
